# Supplementary material for: Exploring structural trends for complexes of Me2E(OSO2CF3)2 (E = Si, Ge, Sn) with pyridine derivatives
Source: Royal Society of Chemistry journal article supplement (doi:10.1039/c4cc01109k), 2014-01-01
Supplement: c4cc01109k1.pdf [file c4cc01109k1.pdf]

*Supporting Information for*

**Exploring Structural Trends for Complexes of  $\text{Me}_2\text{E}(\text{OSO}_2\text{CF}_3)_2$  (E = Si, Ge, Sn) with Pyridine Derivatives**

Alasdair P. M. Robertson,<sup>a</sup> Jordan N. Friedmann,<sup>a</sup> Hilary A. Jenkins<sup>b</sup> and Neil Burford<sup>\*a</sup>

<sup>a</sup> *Department of Chemistry, University of Victoria, Victoria, BC, Canada*

<sup>b</sup> *Analytical X-ray Diffraction Facility, McMaster University, Hamilton, Ontario, Canada*

**Contents**

(a) Experimental

(i) *Preparative Procedures*

(ii) *Attempted Syntheses of  $[\text{Me}_2\text{C}(\text{dmap})_2][\text{OTf}]_2$  and  $[\text{Me}_2\text{C}(\text{bipy})][\text{OTf}]_2$*

(b) X-ray Crystallographic Information

## (a) Experimental

All reactions and manipulations were performed under an atmosphere of nitrogen using either standard Schlenk techniques, or within an MBraun or Innovative Technology glovebox. All non-deuterated solvents were initially dried *via* a Grubbs solvent purification system, and subsequently distilled from CaH<sub>2</sub>. Me<sub>2</sub>SiCl<sub>2</sub>, Me<sub>2</sub>GeCl<sub>2</sub>, Me<sub>2</sub>SnCl<sub>2</sub>, MeOTf, AlCl<sub>3</sub>, GaCl<sub>3</sub>, 4-(dimethylamino)pyridine (*dmap*), 2,2'-bipyridine (*bipy*) were purchased from Sigma Aldrich Ltd. and used without further purification, with the exception of *dmap* and *bipy*, which were sublimed under high vacuum and recrystallised from CH<sub>2</sub>Cl<sub>2</sub>, respectively. Me<sub>2</sub>CCl<sub>2</sub> and Me<sub>2</sub>CBr<sub>2</sub> was purchased from Sigma Aldrich Ltd. and Acros Organics, respectively, and distilled from CaCl<sub>2</sub> prior to use. AgOTf was purchased from Strem Chemicals and used as received. Deuterated solvents were purchased from Sigma Aldrich Ltd. as single unit ampoules, and used without further purification.

NMR spectra were recorded using either Bruker Avance 500, 360 or 300 MHz spectrometers. Chemical shifts are reported relative to residual protonated solvent peaks (<sup>1</sup>H, <sup>13</sup>C), or to external H<sub>3</sub>PO<sub>4</sub> (<sup>31</sup>P); CFCl<sub>3</sub> (<sup>19</sup>F); Me<sub>4</sub>Sn (<sup>119</sup>Sn); Me<sub>4</sub>Si (<sup>29</sup>Si). IR spectra were recorded on a Perkin Elmer Spectrum 1000 FT-IR spectroscopy as Nujol mulls on KBr plates.

X-ray crystallographic data were collected at the MAX Diffraction Facility at McMaster University. Suitable crystals were selected and mounted in Paratone oil on a MiTeGen loop, then placed in the cold stream of the diffractometer (173 K). Data were collected using 0.5 degree omega and phi scans on a Bruker Apex2 diffractometer using MoK(alpha) radiation, or on a Bruker Smart6000 CCD detector / Bruker D8 3-circle goniometer / Rigaku Cu rotating anode X-ray generator with Göbel cross-coupled parallel focussing mirrors, using 0.5 degree omega scans. Unit cell parameters were determined from three consecutive scans at different orientations. The data were integrated using SAINT and then corrected for absorption with SADABS (face-indexing and redundancy). Software: Bruker APEX2 v2013.10.0: Bruker AXS Inc., Madison, WI. For full crystallographic details, see Section (iii) below. Molecular structures presented in the manuscript were plotted using ORTEP-3 V2.02, with thermal ellipsoids at the 50% probability level. CCDC depositions 977497-977502 contain the supplementary crystallographic data for this paper.

Elemental analyses were performed by Canadian Microanalytical Service Ltd., Delta British Columbia, Canada.

### (i) Preparative Procedures

The compounds  $[\text{Me}_2\text{E}(\text{dmap})_2][\text{OTf}]_2$  (E = Si or Ge), were prepared *via* analogous methodologies. The preparation of  $[\text{Me}_2\text{Si}(\text{dmap})_2][\text{OTf}]_2$  is, therefore, described in detail as a representative example.  **$[\text{Me}_2\text{Si}(\text{dmap})_2][\text{OTf}]_2$** : To a solution of  $\text{Me}_2\text{SiCl}_2$  (75.3 mg, 0.58 mmol) in  $\text{CH}_2\text{Cl}_2$  (6 mL) was added solid  $\text{AgOTf}$  (300 mg, 1.17 mmol), and the mixture stirred at ambient temperature for 1 h in the dark. The mixture was then filtered to remove  $\text{AgCl}$ , and cooled to  $-30\text{ }^\circ\text{C}$  before the addition of solid *dmap* (142.6 mg, 1.17 mmol). The clear, colourless reaction mixture was then stirred for a further 1 h at ambient temperature, before removing all volatiles under high vacuum, yielding the product as a colourless solid. *X*-ray quality crystals were grown from a  $\text{CH}_2\text{Cl}_2/\text{Et}_2\text{O}$  mixture at  $-30\text{ }^\circ\text{C}$ . Yield: 0.31 g, 88%;  $^1\text{H}$  NMR (300 MHz,  $\text{CD}_2\text{Cl}_2$ ):  $\delta_{\text{H}}$  8.24-8.18 (4H, m, Ar-H), 6.94-6.88 (4H, m, Ar-H), 3.24 (12H, s,  $\text{N}(\text{CH}_3)_2$ ), 1.29 (6H, s [w/ $^{29}\text{Si}$  satellites,  $J_{\text{HSi}} = 124\text{ Hz}$ ],  $\text{Si}(\text{CH}_3)_2$ );  $^{19}\text{F}$  NMR (283 MHz,  $\text{CD}_2\text{Cl}_2$ ):  $\delta_{\text{F}}$  -78.74 (s,  $\text{CF}_3$ );  $^{13}\text{C}$  NMR (76 MHz,  $\text{CD}_2\text{Cl}_2$ ):  $\delta_{\text{C}}$  158.0 (s), 143.2(s), 121.3 (q,  $J_{\text{CF}} = 322\text{ Hz}$ ,  $\text{CF}_3$ ), 109.23(s), 40.8(s), -3.3 (s);  $^{29}\text{Si}$  NMR (72 MHz,  $\text{CD}_2\text{Cl}_2$ ):  $\delta_{\text{Si}}$  25.8 (s,  $\text{SiMe}_2$ ); FT-IR (Nujol Mull, ranked intensities): 1642(5), 1577(4), 1270(1), 1219(9), 1145(7), 1088(8), 1068(4), 1027(2), 822(6), 633(3), 517(10); Melting Range: 192-194  $^\circ\text{C}$ ; Elemental Analysis: Calculated (%): C: 35.99, H: 4.36, N: 9.33, Found (%): C: 35.17, H: 4.51, N: 9.51.

**$[\text{Me}_2\text{Ge}(\text{dmap})_2][\text{OTf}]_2$** : Colourless solid. In this case the product was only sparingly soluble in  $\text{CH}_2\text{Cl}_2$ , thus *X*-ray quality crystals were obtained from a  $\text{MeCN}/\text{Et}_2\text{O}$  mixture at  $-30\text{ }^\circ\text{C}$ . Yield: 0.45 g, 86%,  $^1\text{H}$  NMR (300 MHz,  $\text{CD}_2\text{Cl}_2$ ):  $\delta_{\text{H}}$  8.07-8.01 (4H, m, Ar-H), 6.81-6.75 (4H, m, Ar-H), 3.19 (12H, s,  $\text{N}(\text{CH}_3)_2$ ), 1.63 (6H, s,  $\text{Ge}(\text{CH}_3)_2$ );  $^{19}\text{F}$  NMR (283 MHz,  $\text{CD}_2\text{Cl}_2$ ):  $\delta_{\text{F}}$  -78.73 (s,  $\text{CF}_3$ );  $^{13}\text{C}$  NMR (91 MHz,  $\text{CD}_2\text{Cl}_2$ ):  $\delta_{\text{C}}$  156.6 (s, Ar-H), 143.8 (s, Ar-H), 120.8 (q,  $J_{\text{CF}} = 321\text{ Hz}$ ,  $\text{CF}_3$ ), 108.2 (s, Ar-H), 39.8 (s,  $\text{N}(\text{CH}_3)_2$ ), 3.6 (s,  $\text{Ge}(\text{CH}_3)_2$ ); FT-IR (Nujol Mull, ranked intensities): 1632(5), 1573(9), 12765(2), 1252(1), 1223(7), 1160(6), 1059(8), 1031(3), 836(10), 638(4); Melting Range: 206-208  $^\circ\text{C}$ ; Elemental Analysis: Calculated (%): C: 33.51, H: 4.06, N: 8.68, Found (%): C: 33.19, H: 4.26, N: 8.88.

**$\text{Me}_2\text{Sn}(\text{dmap})_2(\text{OTf})_2$** : To a solution of  $\text{Me}_2\text{SnCl}_2$  (85.9 mg, 0.39 mmol) in  $\text{MeCN}$  (4 mL) was added solid *dmap* (95.4 mg, 0.78 mmol), and the resulting cloudy mixture was stirred at ambient temperature for 1 h. Solid  $\text{AgOTf}$  (200 mg, 0.78 mmol) was then added, and the mixture stirred for a further 1 h before filtering to remove  $\text{AgCl}$ . All volatiles were then removed under high vacuum, yielding a white powder, from which *X*-ray quality crystals were grown *via*

recrystallization from a MeCN/Et<sub>2</sub>O mixture at -30 °C. Yield: 0.21 g, 77%; <sup>1</sup>H NMR (300 MHz, CD<sub>3</sub>CN): δ<sub>H</sub> 7.89 - 7.85 (4H, m, Ar-H), 6.74 - 6.69 (4H, m, Ar-H), 3.07 (12H, s, N(CH<sub>3</sub>)<sub>2</sub>), 1.42 (6H, s [w/Sn satellites, *J*<sub>H<sub>Sn</sub></sub> = 87 and 91 Hz], Sn(CH<sub>3</sub>)<sub>2</sub>); <sup>19</sup>F NMR (283 MHz, CD<sub>3</sub>CN): δ<sub>F</sub> -79.22 (s, CF<sub>3</sub>); <sup>13</sup>C NMR (76 MHz, CD<sub>3</sub>CN): δ<sub>C</sub> 156.1 (s, Ar-H), 144.6 (s, Ar-H), 107.3 (s, Ar-H), 38.7 (s, N(CH<sub>3</sub>)<sub>2</sub>), 7.3 (s, Sn(CH<sub>3</sub>)<sub>2</sub>); <sup>119</sup>Sn NMR (134 MHz, CD<sub>3</sub>CN): δ<sub>Sn</sub> -175.0 (br. s); FT-IR (Nujol Mull, ranked intensities): 1633(7), 1309(3), 1247(1), 1206(5), 1173(2), 1060(8), 1025(4), 721(10), 638(6), 517(9); Melting Range: 219-221 °C; Elemental Analysis: Calculated (%): C: 31.28, H: 3.79, N: 8.11, Found (%) C: 31.41, H: 3.91, N: 8.24.

Products of the form [Me<sub>2</sub>E(2,2'-*bipy*)(OTf)][OTf] (E = Si or Ge), were prepared *via* analogous methodologies. The preparation of [Me<sub>2</sub>Si(2,2'-*bipy*)(OTf)][OTf] will, therefore, be described in detail as a representative example. **[Me<sub>2</sub>Si(2,2'-*bipy*)(OTf)][OTf]**: To a solution of Me<sub>2</sub>SiCl<sub>2</sub> (50.2 mg, 0.39 mmol) in CH<sub>2</sub>Cl<sub>2</sub> (6 mL) was added solid AgOTf (200 mg, 0.79 mmol), and the mixture stirred for 1 h at ambient temperature in the dark. The resulting mixture was then filtered to remove AgCl, and the resulting clear colourless solution cooled to -30 °C before the addition of solid 2,2'-*bipy* (60.8 mg, 0.39 mmol). Over 1 h at ambient temperature a colourless solid was observed to precipitate. All volatiles were subsequently removed under high vacuum, and the resulting colourless solid recrystallised from MeCN/Et<sub>2</sub>O at -30 °C to furnish X-ray quality crystals of the desired product. Yield: 0.18 g, 89%, <sup>1</sup>H NMR (360 MHz, CD<sub>3</sub>CN): δ<sub>H</sub> 9.19-9.07 (2H, m, Ar-H), 8.87-8.75 (2H, m, Ar-H), 8.74-8.62 (2H, m, Ar-H), 8.22-8.11 (2H, m, Ar-H), 0.96 (6H, s, Si(CH<sub>3</sub>)<sub>2</sub>); <sup>19</sup>F NMR (283 MHz, CD<sub>3</sub>CN): δ<sub>F</sub> -78.99 (s); <sup>13</sup>C NMR (91 MHz, CD<sub>3</sub>CN): δ<sub>C</sub> 148.3 (s), 148.2 (s), 146.9 (s), 131.0 (s), 125.0 (s), 120.9 (q, <sup>1</sup>*J*<sub>CF</sub> = 320 Hz, CF<sub>3</sub>), 6.7 (s); <sup>29</sup>Si NMR (72 MHz, CD<sub>3</sub>CN): δ<sub>Si</sub> -47.0 (s); FT-IR (Nujol Mull, ranked intensities): 1259(1), 1193(5), 1157(3), 1073(10), 1032(4), 984(6), 782(7), 771(9), 722(2), 637(8); Melting Range: >180 °C (decomposes); Elemental Analysis: Calculated (%): C: 32.81, H: 2.75, N: 5.46, Found (%) C: 32.34, H: 2.76, N: 5.57.

**[Me<sub>2</sub>Ge(2,2'-*bipy*)(OTf)][OTf]**: Colourless solid. X-ray quality crystals grown from MeCN/Et<sub>2</sub>O at -30 °C. Yield: 0.37 g, 83%, <sup>1</sup>H NMR (300 MHz, CD<sub>3</sub>CN): δ<sub>H</sub> 9.33-9.27 (2H, m, Ar-H), 8.87-8.81 (2H, m, Ar-H), 8.72-8.65 (2H, m, Ar-H), 8.21-8.15 (2H, m, Ar-H), 1.61 (6H, s, Ge(CH<sub>3</sub>)<sub>2</sub>); <sup>19</sup>F NMR (282 MHz, CD<sub>3</sub>CN): δ<sub>F</sub> -78.76 (s); <sup>13</sup>C NMR (76 MHz, CD<sub>3</sub>CN): δ<sub>C</sub> 148.5 (s), 148.3 (s), 147.7 (s), 131.5 (s), 126.0 (s), 124.4 (s), 121.7 (q, <sup>1</sup>*J*<sub>CF</sub> = 320 Hz, CF<sub>3</sub>), 12.6 (s); FT-IR (Nujol Mull, ranked intensities): 1339(8), 1283(1), 1224(2), 1184(7), 1149(3), 1032(6),

1022(4), 783(9), 637(5), 573(10), 516(6); Melting Range: 214-216 °C; Elemental Analysis: Calculated (%): C: 30.18, H: 2.53, N: 5.03, Found (%): C: 30.07, H: 2.46, N: 5.02.

**Me<sub>2</sub>Sn(2,2'-*bipy*)(OTf)<sub>2</sub>:** To a solution of Me<sub>2</sub>SnCl<sub>2</sub> (85.9 mg, 0.39 mmol) in MeCN (4 mL) was added solid 2,2'-*bipy* (61.0 mg, 0.78 mmol), and the resulting cloudy mixture was stirred at ambient temperature for 1 h. Solid AgOTf (200 mg, 0.78 mmol) was then added, and the mixture stirred for a further 1 h before filtering to remove AgCl. All volatiles were then removed under high vacuum, yielding a white powder, from which *X*-ray quality crystals were grown *via* recrystallisation from a MeCN/Et<sub>2</sub>O mixture at -30 °C. Yield: 0.21 g, 90%, <sup>1</sup>H NMR (300 MHz, CD<sub>3</sub>CN): δ<sub>H</sub> 9.23-9.11 (2H, m, Ar-H), 8.76-8.63 (2H, m, Ar-H), 8.59-8.46 (2H, m, Ar-H), 8.11-7.98 (2H, m, Ar-H), 1.35 (6H, s [w/Sn satellites, 96 and 100 Hz], Sn(CH<sub>3</sub>)<sub>2</sub>); <sup>19</sup>F NMR (283 MHz, CD<sub>3</sub>CN): δ<sub>F</sub> -79.07; <sup>13</sup>C NMR (91 MHz, CD<sub>3</sub>CN): δ<sub>C</sub> 149.2 (s), 149.1 (s), 145.6 (s), 130.2 (s), 125.7 (s), 14.2 (s); <sup>119</sup>Sn NMR (134 MHz, CD<sub>3</sub>CN): δ<sub>Sn</sub> -216.9 (s), FT-IR (Nujol Mull, ranked intensities): 1327(6), 1314(4), 1249(2), 1234(3), 1200(7), 1171(1), 1018(5), 780(10), 730(9), 633(8); Melting Range: 206-208 °C; Elemental Analysis: Calculated (%): C: 27.88, H: 2.34, N: 4.64, Found (%): C: 27.65, H: 2.40, N: 4.63.

## (ii) Attempted Syntheses of [Me<sub>2</sub>C(*dmap*)<sub>2</sub>][OTf]<sub>2</sub> and [Me<sub>2</sub>C(*bipy*)][OTf]<sub>2</sub>

Syntheses of [Me<sub>2</sub>C(*dmap*)<sub>2</sub>][OTf]<sub>2</sub> and [Me<sub>2</sub>C(*bipy*)][OTf]<sub>2</sub>, respectively were attempted unsuccessfully by a variety of methods as discussed below. Attempts to synthesise [Me<sub>2</sub>C(*dmap*)<sub>2</sub>][OTf]<sub>2</sub> are described as representative examples.

As for the analogous Si, Ge and Sn compounds, synthetic investigations were initiated using Me<sub>2</sub>CCl<sub>2</sub> (2,2-dichloropropane) as a precursor. Upon the treatment of this compound with two equivalents of AgOTf in CH<sub>2</sub>Cl<sub>2</sub> solution a darkening of the reaction mixture was observed over 1 h, with a deep maroon solution attained following filtration. The addition of two equivalents of *dmap* to the mixture led to the loss of maroon colour, and the immediate development of a light yellow solution with the precipitation of a colourless solid. Upon removal of all volatiles under high vacuum, however, <sup>1</sup>H NMR in d<sub>3</sub>-MeCN indicated that the desired complex had not been formed, with the only involatile species in fact consistent with [H-*dmap*][OTf], although the mechanism of the formation of this species remains unclear. Identical behavior was observed upon repeating this experiment with the dibromoalkane Me<sub>2</sub>CBr<sub>2</sub>. Repeating reactions of

$\text{Me}_2\text{CX}_2$  ( $\text{X} = \text{Cl}$  or  $\text{Br}$ ) in  $\text{C}_6\text{D}_6$  and  $\text{CD}_3\text{CN}$  produced no evidence of halide abstraction by  $\text{AgOTf}$  over 1 h at ambient temperature, with only  $\text{Me}_2\text{CX}_2$  remaining in solution.

Similar abstraction reactions were subsequently attempted using alternative sources of the  $\text{OTf}$  anion, namely  $\text{MeOTf}$  and  $\text{Me}_3\text{SiOTf}$ , with no evidence of halide abstraction apparent at ambient temperature upon the treatment of  $\text{CH}_2\text{Cl}_2$  solution of  $\text{Me}_2\text{CX}_2$  with either abstractor. In these cases addition of solid *dmap* to a mixture of the abstractor and haloalkane led only to the formation of adducts the *dmap* adducts  $[\text{Me-dmap}][\text{OTf}]$  and  $[\text{Me}_3\text{Si-dmap}][\text{OTf}]$ , respectively, the identity of which was confirmed by independent synthesis.

Thermolytic synthesis of  $[\text{Me}_2\text{C}(\text{dmap})_2][\text{X}]_2$  ( $\text{X} = \text{Cl}$  or  $\text{Br}$ ), from which halide exchange could finally yield the desired triflate salt, was also attempted, but heating a mixture of  $\text{Me}_2\text{CX}_2$  and two equivalents of *dmap* in toluene at  $100^\circ\text{C}$  over 42 h did not yield the desired product, with only unreacted *dmap* recovered following removal of all volatiles under high vacuum. Similarly, the addition of *dmap* to an excess of neat  $\text{Me}_2\text{CCl}_2$  led to no reaction over 100 h at either ambient temperature or  $75^\circ\text{C}$ .

**Attempted synthesis of  $[\text{Me}_2\text{C}(\text{dmap})_2][\text{OTf}]_2$  using  $\text{AgOTf}$ :** To a solution of  $\text{Me}_2\text{CX}_2$  ( $\text{X} = \text{Cl}$  or  $\text{Br}$ ) (0.15 mmol) in  $\text{CD}_2\text{Cl}_2$  (1 mL) at ambient temperature was added solid  $\text{AgOTf}$  (78.6 mg, 0.30 mmol) and the mixture stirred for 1 h before filtering becoming a dark brown in colour. The mixture was then filtered and analyzed by  $^1\text{H}$  NMR spectroscopy which indicated the formation of >10 new products, with no species particularly prevalent. The  $^{19}\text{F}$  NMR spectrum also displayed 3 resonances, all consistent with triflate anions. Solid *dmap* (36.6 mg, 0.30 mmol) was added to the mixtures leading to immediate formation of a white precipitate and loss of the brown colour. Removal of all volatiles from the reaction mixture and dissolution of the residual solids in  $\text{d}_3\text{-MeCN}$  evidenced the clean formation of a species consistent with  $[\text{H-dmap}][\text{OTf}]$  for both  $\text{Me}_2\text{CCl}_2$  and  $\text{Me}_2\text{CBr}_2$ .  $^1\text{H}$  NMR (300 MHz,  $\text{d}_3\text{-MeCN}$ ):  $\delta_{\text{H}}$  11.64 (1H, s,  $[\underline{\text{H}}\text{-dmap}]$ ), 8.01-7.95 (2H, m, Ar-H), 6.80-6.75 (2H, m, Ar-H), 3.10 (6H, s,  $\text{NMe}_2$ );  $^{19}\text{F}$  NMR (283 MHz,  $\text{d}_3\text{-MeCN}$ ):  $\delta_{\text{F}}$  -79.28 (s,  $\text{CF}_3$ ).

$\text{C}_6\text{D}_6$ : The reaction of  $\text{Me}_2\text{CX}_2$  ( $\text{X} = \text{Cl}$  or  $\text{Br}$ ) with two equivalents of  $\text{AgOTf}$  in  $\text{C}_6\text{D}_6$  led to no abstraction over 2 h at ambient temperature by  $^1\text{H}$  NMR, with only unreacted dihaloalkane present in solution [ $\delta_{\text{H}}$  1.76 or 2.10 for  $\text{X} = \text{Cl}$  or  $\text{Br}$ , respectively].

*CD<sub>3</sub>CN*: The reaction of Me<sub>2</sub>CX<sub>2</sub> (X = Cl or Br) with two equivalents of AgOTf in CD<sub>3</sub>CN led to no abstraction over 2 h at ambient temperature by <sup>1</sup>H NMR, with only unreacted dihaloalkane present in solution [ $\delta_{\text{H}}$  2.16 or 2.59 for X = Cl or Br, respectively].

**Attempted synthesis of [Me<sub>2</sub>C(*dmap*)<sub>2</sub>][OTf]<sub>2</sub> using Me<sub>3</sub>SiOTf or MeOTf:** To a solution of Me<sub>2</sub>CX<sub>2</sub> (X = Cl or Br) (0.15 mmol) in CD<sub>2</sub>Cl<sub>2</sub> (1 mL) at ambient temperature was added neat Me<sub>3</sub>SiOTf (66.6 mg, 0.30 mmol) or MeOTf (49.2 mg, 0.30 mmol) and the mixture stirred for 1 h. The mixture was then cooled to -30 °C, and solid *dmap* then added before warming to ambient temperature and stirring for a further 1 h. The mixture was then analyzed by <sup>1</sup>H NMR spectroscopy (CD<sub>2</sub>Cl<sub>2</sub>), which indicated the formation of products consistent with [Me<sub>3</sub>Si(*dmap*)][OTf] and [Me(*dmap*)][OTf], respectively (see below for independent preparation), with unreacted Me<sub>2</sub>CX<sub>2</sub> also apparent ( $\delta_{\text{H}}$  2.18 or 2.54 for X = Cl or Br, respectively).

**Synthesis of [Me<sub>3</sub>Si(*dmap*)][OTf]:** To a solution of Me<sub>3</sub>SiOTf (54.6 mg, 0.25 mmol) in CH<sub>2</sub>Cl<sub>2</sub> (4 mL) at -30 °C was added solid *dmap* (30 mg, 0.25 mmol), and the mixture warmed to ambient temperature and stirred for 1 h before the removal of all volatiles under high vacuum to yield a colourless solid. <sup>1</sup>H NMR (300 MHz, CD<sub>2</sub>Cl<sub>2</sub>):  $\delta_{\text{H}}$  8.02 (2H, m, Ar-H), 6.93 (2H, m, Ar-H), 3.22 (6H, s, NMe<sub>2</sub>), 0.58 (9H, s, SiMe<sub>3</sub>); <sup>19</sup>F NMR (283 MHz, CD<sub>2</sub>Cl<sub>2</sub>):  $\delta_{\text{F}}$  -78.78 (s, CF<sub>3</sub>); <sup>13</sup>C NMR (76 MHz, CD<sub>2</sub>Cl<sub>2</sub>):  $\delta_{\text{C}}$  157.5 (s, Ar), 143.3 (s, Ar), 121.4 (q,  $J_{\text{CF}}$  = 322 Hz, CF<sub>3</sub>), 108.9 (s, Ar), 40.45 (s, Me), 0.8 (s, SiMe<sub>3</sub>); <sup>29</sup>Si NMR (71.6 MHz, CD<sub>2</sub>Cl<sub>2</sub>):  $\delta_{\text{Si}}$  31.9 (s, SiMe<sub>3</sub>).

**Synthesis of [Me(*dmap*)][OTf]:** To a solution of MeOTf 47.7 mg, 0.25 mmol) in CH<sub>2</sub>Cl<sub>2</sub> (4 mL) at -30 °C was added solid *dmap* (30 mg, 0.25 mmol), and the mixture warmed to ambient temperature and stirred for 1 h before the removal of all volatiles under high vacuum. <sup>1</sup>H NMR (300 MHz, CD<sub>2</sub>Cl<sub>2</sub>):  $\delta_{\text{H}}$  8.0 (2H, m, Ar-H), 6.83 (2H, m, Ar-H), 3.94 (3H, s, Me-*dmap*), <sup>19</sup>F NMR (283 MHz, CD<sub>2</sub>Cl<sub>2</sub>):  $\delta_{\text{F}}$  -78.90 (s, CF<sub>3</sub>), <sup>13</sup>C NMR (76 MHz, CD<sub>2</sub>Cl<sub>2</sub>):  $\delta_{\text{C}}$  156.7 (s, Ar), 143.1 (s, Ar), 121.4 (q,  $J_{\text{CF}}$  = 321 Hz, CF<sub>3</sub>), 108.4 (s, Ar), 45.3 (s, Me), 40.6 (s, NMe<sub>2</sub>).

**Attempted synthesis of [Me<sub>2</sub>C(*dmap*)<sub>2</sub>][OTf]<sub>2</sub> (Toluene thermolysis):** To a solution of Me<sub>2</sub>CX<sub>2</sub> (X = Cl or Br) (0.41 mmol) in toluene (4 mL) was added solid *dmap* (100 mg, 0.82 mmol), and the reaction heated to 100 °C over 42 h in a sealed reaction tube. All volatiles were then subsequently removed from the clear, colourless solution, and the resulting colourless solids

analyzed by  $^1\text{H}$  NMR, indicating the presence of only unreacted *dmap*.  $^1\text{H}$  NMR (300 MHz,  $\text{CD}_2\text{Cl}_2$ ):  $\delta_{\text{H}}$  8.19-8.13 (2H, m, Ar-H), 6.49-6.45 (2H, m, Ar-H), 2.94 (6H, s,  $\text{NMe}_2$ ).

**Attempted synthesis of  $[\text{Me}_2\text{C}(\textit{dmap})_2][\text{OTf}]_2$  (Neat  $\text{Me}_2\text{CCl}_2$  as solvent):** To solid *dmap* (50 mg, 0.41 mmol) was added neat  $\text{Me}_2\text{CCl}_2$  (0.5 mL, 5.1 mmol) and the resulting mixture stirred at ambient temperature over 100 h. All volatiles were then removed under high vacuum, and the resulting solids analyzed by  $^1\text{H}$  NMR in  $\text{CD}_2\text{Cl}_2$  indicating only unreacted *dmap*. An identical result was recorded on repeating this experiment at 75 °C over the same time period.

## (b) X-ray Crystallographic Information

### [Me<sub>2</sub>Si(*dmap*)<sub>2</sub>][OTf]<sub>2</sub> (CCDC Number: 977497)

|                                   |                                                                                                                                    |
|-----------------------------------|------------------------------------------------------------------------------------------------------------------------------------|
| Empirical formula                 | C <sub>20</sub> H <sub>30</sub> Cl <sub>4</sub> F <sub>6</sub> N <sub>4</sub> O <sub>6</sub> S <sub>2</sub> Si                     |
| Formula weight                    | 770.49                                                                                                                             |
| Temperature                       | 173(2) K                                                                                                                           |
| Wavelength                        | 1.54178 Å                                                                                                                          |
| Crystal system                    | Triclinic                                                                                                                          |
| Space group                       | P -1                                                                                                                               |
| Unit cell dimensions              | a = 8.1122(4) Å<br>b = 11.4867(6) Å<br>c = 18.7960(9) Å<br>$\alpha$ = 95.057(2)°<br>$\beta$ = 98.939(2)°<br>$\gamma$ = 108.631(2)° |
| Volume                            | 1621.66(14) Å <sup>3</sup>                                                                                                         |
| Z                                 | 2                                                                                                                                  |
| Density (calculated)              | 1.578 Mg/m <sup>3</sup>                                                                                                            |
| Absorption coefficient            | 5.574 mm <sup>-1</sup>                                                                                                             |
| F(000)                            | 788                                                                                                                                |
| Crystal size                      | 0.724 x 0.571 x 0.312 mm <sup>3</sup>                                                                                              |
| Theta range for data collection   | 2.406 to 68.244°                                                                                                                   |
| Index ranges                      | -9 ≤ h ≤ 9, -13 ≤ k ≤ 13, -22 ≤ l ≤ 22                                                                                             |
| Reflections collected             | 17672                                                                                                                              |
| Independent reflections           | 5782 [R(int) = 0.0357]                                                                                                             |
| Completeness to theta = 67.679°   | 97.7 %                                                                                                                             |
| Absorption correction             | Numerical                                                                                                                          |
| Max. and min. transmission        | 0.4629 and 0.1285                                                                                                                  |
| Refinement method                 | Full-matrix least-squares on F <sup>2</sup>                                                                                        |
| Data / restraints / parameters    | 5782 / 9 / 398                                                                                                                     |
| Goodness-of-fit on F <sup>2</sup> | 1.451                                                                                                                              |
| Final R indices [I > 2σ(I)]       | R <sub>1</sub> = 0.0571, wR <sub>2</sub> = 0.1757                                                                                  |
| R indices (all data)              | R <sub>1</sub> = 0.0636, wR <sub>2</sub> = 0.1836                                                                                  |
| Extinction coefficient            | n/a                                                                                                                                |
| Largest diff. peak and hole       | 0.980 and -1.048 e.Å <sup>-3</sup>                                                                                                 |

**[Me<sub>2</sub>Ge(*dmap*)<sub>2</sub>][OTf]<sub>2</sub> (CCDC Number: 977499)**

|                                   |                                                                                                                                            |
|-----------------------------------|--------------------------------------------------------------------------------------------------------------------------------------------|
| Empirical formula                 | C <sub>20</sub> H <sub>26</sub> F <sub>6</sub> Ge N <sub>5</sub> O <sub>6</sub> S <sub>2</sub>                                             |
| Formula weight                    | 677.12                                                                                                                                     |
| Temperature                       | 173(2) K                                                                                                                                   |
| Wavelength                        | 0.71073 Å                                                                                                                                  |
| Crystal system                    | Monoclinic                                                                                                                                 |
| Space group                       | P 2 <sub>1</sub> /c                                                                                                                        |
| Unit cell dimensions              | a = 10.6701(13) Å<br>b = 11.5348(14) Å<br>c = 23.336(3) Å<br>$\alpha = 90^\circ$ .<br>$\beta = 93.922(2)^\circ$ .<br>$\gamma = 90^\circ$ . |
| Volume                            | 2865.5(6) Å <sup>3</sup>                                                                                                                   |
| Z                                 | 4                                                                                                                                          |
| Density (calculated)              | 1.570 Mg/m <sup>3</sup>                                                                                                                    |
| Absorption coefficient            | 1.297 mm <sup>-1</sup>                                                                                                                     |
| F(000)                            | 1364                                                                                                                                       |
| Crystal size                      | 0.273 x 0.137 x 0.135 mm <sup>3</sup>                                                                                                      |
| Theta range for data collection   | 1.749 to 29.673°.                                                                                                                          |
| Index ranges                      | -14 ≤ h ≤ 14, -16 ≤ k ≤ 16, -32 ≤ l ≤ 32                                                                                                   |
| Reflections collected             | 45770                                                                                                                                      |
| Independent reflections           | 8101 [R(int) = 0.0449]                                                                                                                     |
| Completeness to theta = 25.242°   | 99.9 %                                                                                                                                     |
| Absorption correction             | Numerical                                                                                                                                  |
| Max. and min. transmission        | 0.9026 and 0.8264                                                                                                                          |
| Refinement method                 | Full-matrix least-squares on F <sup>2</sup>                                                                                                |
| Data / restraints / parameters    | 8101 / 0 / 371                                                                                                                             |
| Goodness-of-fit on F <sup>2</sup> | 0.970                                                                                                                                      |
| Final R indices [I > 2σ(I)]       | R <sub>1</sub> = 0.0370, wR <sub>2</sub> = 0.0962                                                                                          |
| R indices (all data)              | R <sub>1</sub> = 0.0584, wR <sub>2</sub> = 0.1061                                                                                          |
| Extinction coefficient            | n/a                                                                                                                                        |
| Largest diff. peak and hole       | 0.670 and -0.619 e.Å <sup>-3</sup>                                                                                                         |

**Me<sub>2</sub>Sn(*dmap*)<sub>2</sub>(OTf)<sub>2</sub> (CCDC Number: 977501)**

|                                   |                                                                                                                                            |
|-----------------------------------|--------------------------------------------------------------------------------------------------------------------------------------------|
| Empirical formula                 | C18 H26 F6 N4 O6 S2 Sn                                                                                                                     |
| Formula weight                    | 691.24                                                                                                                                     |
| Temperature                       | 173(2) K                                                                                                                                   |
| Wavelength                        | 0.71073 Å                                                                                                                                  |
| Crystal system                    | Monoclinic                                                                                                                                 |
| Space group                       | C 2/c                                                                                                                                      |
| Unit cell dimensions              | a = 9.4758(5) Å<br>b = 13.6913(6) Å<br>c = 21.1332(12) Å<br>$\alpha = 90^\circ$ .<br>$\beta = 100.452(2)^\circ$ .<br>$\gamma = 90^\circ$ . |
| Volume                            | 2696.2(2) Å <sup>3</sup>                                                                                                                   |
| Z                                 | 4                                                                                                                                          |
| Density (calculated)              | 1.703 Mg/m <sup>3</sup>                                                                                                                    |
| Absorption coefficient            | 1.184 mm <sup>-1</sup>                                                                                                                     |
| F(000)                            | 1384                                                                                                                                       |
| Crystal size                      | 0.166 x 0.141 x 0.078 mm <sup>3</sup>                                                                                                      |
| Theta range for data collection   | 1.960 to 34.308°.                                                                                                                          |
| Index ranges                      | -14 ≤ h ≤ 15, -21 ≤ k ≤ 21, -33 ≤ l ≤ 33                                                                                                   |
| Reflections collected             | 32769                                                                                                                                      |
| Independent reflections           | 5618 [R(int) = 0.0323]                                                                                                                     |
| Completeness to theta = 25.242°   | 99.9 %                                                                                                                                     |
| Absorption correction             | Numerical                                                                                                                                  |
| Max. and min. transmission        | 0.9525 and 0.8654                                                                                                                          |
| Refinement method                 | Full-matrix least-squares on F <sup>2</sup>                                                                                                |
| Data / restraints / parameters    | 5618 / 0 / 168                                                                                                                             |
| Goodness-of-fit on F <sup>2</sup> | 1.040                                                                                                                                      |
| Final R indices [I > 2σ(I)]       | R1 = 0.0251, wR2 = 0.0553                                                                                                                  |
| R indices (all data)              | R1 = 0.0359, wR2 = 0.0570                                                                                                                  |
| Extinction coefficient            | n/a                                                                                                                                        |
| Largest diff. peak and hole       | 0.422 and -0.367 e.Å <sup>-3</sup>                                                                                                         |

**[Me<sub>2</sub>Si(*bipy*)(OTf)][OTf] (CCDC Number: 977498)**

|                                   |                                                                                                                                           |
|-----------------------------------|-------------------------------------------------------------------------------------------------------------------------------------------|
| Empirical formula                 | C <sub>14</sub> H <sub>14</sub> F <sub>6</sub> N <sub>2</sub> O <sub>6</sub> S <sub>2</sub> Si                                            |
| Formula weight                    | 512.48                                                                                                                                    |
| Temperature                       | 173(2) K                                                                                                                                  |
| Wavelength                        | 0.71073 Å                                                                                                                                 |
| Crystal system                    | Monoclinic                                                                                                                                |
| Space group                       | C c                                                                                                                                       |
| Unit cell dimensions              | a = 14.1596(18) Å<br>b = 22.794(3) Å<br>c = 7.3679(9) Å<br>$\alpha = 90^\circ$ .<br>$\beta = 118.801(2)^\circ$ .<br>$\gamma = 90^\circ$ . |
| Volume                            | 2083.9(5) Å <sup>3</sup>                                                                                                                  |
| Z                                 | 4                                                                                                                                         |
| Density (calculated)              | 1.633 Mg/m <sup>3</sup>                                                                                                                   |
| Absorption coefficient            | 0.401 mm <sup>-1</sup>                                                                                                                    |
| F(000)                            | 1040                                                                                                                                      |
| Crystal size                      | 0.310 x 0.271 x 0.155 mm <sup>3</sup>                                                                                                     |
| Theta range for data collection   | 1.787 to 29.758°.                                                                                                                         |
| Index ranges                      | -19 ≤ h ≤ 19, -31 ≤ k ≤ 31, -10 ≤ l ≤ 10                                                                                                  |
| Reflections collected             | 20167                                                                                                                                     |
| Independent reflections           | 5944 [R(int) = 0.0219]                                                                                                                    |
| Completeness to theta = 25.242°   | 99.9 %                                                                                                                                    |
| Absorption correction             | Numerical                                                                                                                                 |
| Max. and min. transmission        | 0.9716 and 0.9087                                                                                                                         |
| Refinement method                 | Full-matrix least-squares on F <sup>2</sup>                                                                                               |
| Data / restraints / parameters    | 5944 / 2 / 280                                                                                                                            |
| Goodness-of-fit on F <sup>2</sup> | 1.134                                                                                                                                     |
| Final R indices [I > 2σ(I)]       | R <sub>1</sub> = 0.0310, wR <sub>2</sub> = 0.0759                                                                                         |
| R indices (all data)              | R <sub>1</sub> = 0.0380, wR <sub>2</sub> = 0.0783                                                                                         |
| Absolute structure parameter      | 0.005(18)                                                                                                                                 |
| Extinction coefficient            | n/a                                                                                                                                       |
| Largest diff. peak and hole       | 0.288 and -0.265 e.Å <sup>-3</sup>                                                                                                        |

**[Me<sub>2</sub>Ge(*bipy*)(OTf)][OTf] (CCDC Number: 977500)**

|                                   |                                                                                                                                          |
|-----------------------------------|------------------------------------------------------------------------------------------------------------------------------------------|
| Empirical formula                 | C14 H14 F6 Ge N2 O6 S2                                                                                                                   |
| Formula weight                    | 556.98                                                                                                                                   |
| Temperature                       | 173(2) K                                                                                                                                 |
| Wavelength                        | 0.71073 Å                                                                                                                                |
| Crystal system                    | Triclinic                                                                                                                                |
| Space group                       | P -1                                                                                                                                     |
| Unit cell dimensions              | a = 7.7487(2) Å<br>b = 11.1678(3) Å<br>c = 12.4220(3) Å<br>$\alpha$ = 110.4190(10)°<br>$\beta$ = 95.6880(10)°<br>$\gamma$ = 95.4360(10)° |
| Volume                            | 992.76(4) Å <sup>3</sup>                                                                                                                 |
| Z                                 | 2                                                                                                                                        |
| Density (calculated)              | 1.863 Mg/m <sup>3</sup>                                                                                                                  |
| Absorption coefficient            | 1.845 mm <sup>-1</sup>                                                                                                                   |
| F(000)                            | 556                                                                                                                                      |
| Crystal size                      | 0.329 x 0.292 x 0.174 mm <sup>3</sup>                                                                                                    |
| Theta range for data collection   | 1.767 to 32.500°                                                                                                                         |
| Index ranges                      | -11 ≤ h ≤ 11, -16 ≤ k ≤ 16, -18 ≤ l ≤ 18                                                                                                 |
| Reflections collected             | 25958                                                                                                                                    |
| Independent reflections           | 7179 [R(int) = 0.0154]                                                                                                                   |
| Completeness to theta = 25.242°   | 99.9 %                                                                                                                                   |
| Absorption correction             | Numerical                                                                                                                                |
| Max. and min. transmission        | 0.7825 and 0.6508                                                                                                                        |
| Refinement method                 | Full-matrix least-squares on F <sup>2</sup>                                                                                              |
| Data / restraints / parameters    | 7179 / 0 / 280                                                                                                                           |
| Goodness-of-fit on F <sup>2</sup> | 1.032                                                                                                                                    |
| Final R indices [I > 2σ(I)]       | R1 = 0.0255, wR2 = 0.0708                                                                                                                |
| R indices (all data)              | R1 = 0.0290, wR2 = 0.0725                                                                                                                |
| Extinction coefficient            | n/a                                                                                                                                      |
| Largest diff. peak and hole       | 0.789 and -0.708 e.Å <sup>-3</sup>                                                                                                       |

**Me<sub>2</sub>Sn(*bipy*)(OTf)<sub>2</sub> (CCDC Number: 977502)**

|                                   |                                                                                                                                         |
|-----------------------------------|-----------------------------------------------------------------------------------------------------------------------------------------|
| Empirical formula                 | C <sub>14</sub> H <sub>14</sub> F <sub>6</sub> N <sub>2</sub> O <sub>6</sub> S <sub>2</sub> Sn                                          |
| Formula weight                    | 603.08                                                                                                                                  |
| Temperature                       | 100(2) K                                                                                                                                |
| Wavelength                        | 0.71073 Å                                                                                                                               |
| Crystal system                    | Monoclinic                                                                                                                              |
| Space group                       | P 2 <sub>1</sub> /c                                                                                                                     |
| Unit cell dimensions              | a = 10.623(3) Å<br>b = 15.281(4) Å<br>c = 13.418(3) Å<br>$\alpha = 90^\circ$ .<br>$\beta = 113.235(4)^\circ$ .<br>$\gamma = 90^\circ$ . |
| Volume                            | 2001.6(8) Å <sup>3</sup>                                                                                                                |
| Z                                 | 4                                                                                                                                       |
| Density (calculated)              | 2.001 Mg/m <sup>3</sup>                                                                                                                 |
| Absorption coefficient            | 1.576 mm <sup>-1</sup>                                                                                                                  |
| F(000)                            | 1184                                                                                                                                    |
| Crystal size                      | 0.232 x 0.201 x 0.094 mm <sup>3</sup>                                                                                                   |
| Theta range for data collection   | 2.122 to 33.281°.                                                                                                                       |
| Index ranges                      | -16 ≤ h ≤ 13, -23 ≤ k ≤ 21, -20 ≤ l ≤ 20                                                                                                |
| Reflections collected             | 34376                                                                                                                                   |
| Independent reflections           | 7581 [R(int) = 0.0304]                                                                                                                  |
| Completeness to theta = 25.242°   | 99.9 %                                                                                                                                  |
| Absorption correction             | Numerical                                                                                                                               |
| Max. and min. transmission        | 0.9157 and 0.7783                                                                                                                       |
| Refinement method                 | Full-matrix least-squares on F <sup>2</sup>                                                                                             |
| Data / restraints / parameters    | 7581 / 0 / 282                                                                                                                          |
| Goodness-of-fit on F <sup>2</sup> | 1.042                                                                                                                                   |
| Final R indices [I > 2σ(I)]       | R <sub>1</sub> = 0.0207, wR <sub>2</sub> = 0.0503                                                                                       |
| R indices (all data)              | R <sub>1</sub> = 0.0285, wR <sub>2</sub> = 0.0514                                                                                       |
| Extinction coefficient            | n/a                                                                                                                                     |
| Largest diff. peak and hole       | 0.599 and -0.442 e.Å <sup>-3</sup>                                                                                                      |
